# Supplementary material for: PARP14 Contributes to the Development of the Tumor-Associated Macrophage Phenotype
Source: MDPI journal article supplement (doi:10.3390/ijms25073601), 2024-03-22
Supplement: s1 [file s1]

## Supplementary Tables

**Supplementary Table S1. List of mouse primers used for gene expression analysis by quantitative real-time PCR.**

| Gene name             | Forward primer           | Reverse primer           |
|-----------------------|--------------------------|--------------------------|
| <b>mArg1</b>          | CTTGCGAGACGTAGACCCTG     | GGCCTTTTCTTCCTTCCCAG     |
| <b>mFizz-1</b>        | GCCAATCCAGCTAACTATCCCT   | CAACGAGTAAGCACAGGCAG     |
| <b>mMRC1</b>          | GCAAATGGAGCCGTCTGTGC     | CTCGTGGATCTCCGTGACAC     |
| <b>mHPRT</b>          | AGTGTTGGATACAGGCCAGAC    | CGTGATTCAAATCCCTGAAGT    |
| <b>mB2M</b>           | CTGCTACGTAACACAGTTCCACCC | CATGATGCTTGATCACATGTCTCG |
| <b>mGAPDH</b>         | ACAGTCCATGCCATCACTGCC    | GCCTGCTTCACCACCTTCTTG    |
| <b>mCyclophilin A</b> | TCCGACTGTGGACAGCTCTA     | ATTGCGAGCAGATGGGGTAG     |
| <b>m36B4</b>          | AAGCGCGTCCTGGCATTGTCT    | CCGCAGGGGCAGCAGTGGT      |

**Supplementary Table S2. List of human primers used for gene expression analysis by quantitative real-time PCR.**

| <b>Gene name</b>               | <b>Forward primer</b>    | <b>Reverse primer</b>   |
|--------------------------------|--------------------------|-------------------------|
| <b>hCD-14</b>                  | GGAAGACTTATCGACCATGGA    | GCTGAGGTTCCGAGAAGTTG    |
| <b>hIL-12</b>                  | CCAAGAACTTGCAGCTGAAG     | TGGGTCTATTCCGTTGTGTC    |
| <b>hTNF<math>\alpha</math></b> | TGGGTCTATTCCGTTGTGTC     | GAGGGCTGATTAGAGAGAGGTC  |
| <b>hARG1</b>                   | TCATCTGGGTGGATGCTCACAC   | GAGAATCCTGGCACATCGGGAA  |
| <b>hRETNLB (Fizz-1)</b>        | GCAAGAAGCTCTCGTGTGCTAG   | AACATCCCACGAACCACAGCCA  |
| <b>hMRC1</b>                   | CGAGGAAGAGGTTTCGTTACC    | GCAATCCCGGTTCTCATGGC    |
| <b>hFibronectin</b>            | CCACCCCCATAAGGCATAGG     | GTAGGGGTCAAAGCACGAGTCAT |
| <b>hCCL17</b>                  | ACTTCAAGGGAGCCATTCCC     | CCCTGCACAGTTACAAAA      |
| <b>hCCL18</b>                  | CTCTGCTGCCTCGTCTATACCT   | CTTGTTAGGAGGATGACACCT   |
| <b>hLCN2 (Lipocalin2)</b>      | GTGAGCACCAACTACAACCAGC   | GTTCCGAAGTCAGCTCCTTGGT  |
| <b>hMIF</b>                    | AGAACCGCTCCTACAGCAAGCT   | GGAGTTGTTCCAGCCCACATTG  |
| <b>hPAI-1 (Serpine1)</b>       | CTCATCAGCCACTGGAAAGGCA   | GACTCGTGAAGTCAGCCTGAAAC |
| <b>hGAPDH</b>                  | AGCCTCAAGATCAGCAATG      | ATGGACTGTGGTCATGAGTCCTT |
| <b>hCyclophilin A</b>          | GTCTCCTTTGAGCTGTTTGCAGAC | CTTGCCACCAGTGCCATTATG   |
| <b>h36B4</b>                   | CCATTGAAATCCTGAGTGATGTG  | GTCGAACACCTGCTGGATGAC   |
